# Supplementary material for: Hydrological connectivity between riparian groundwater and streamwater system in Kishanganga Basin: insights from solutes and stable water isotopes
Source: Research Square preprint supplement (doi:10.21203/rs.3.rs-7332425/v1), 2025-09-22
Supplement: Supplementary file 1 [file 2a22e3daebd64e0bc1e352ea.docx]

|  | pH | TDS | F- | Cl- | NO3- | SO42- | NO2- | HCO3- | Mg2+ | Ca2+ | Na+ | K+ | U | As | Cr | Mn |
| --- | --- | --- | --- | --- | --- | --- | --- | --- | --- | --- | --- | --- | --- | --- | --- | --- |
| Groundwater | | | | | | | | | | | | | | | | |
| pH | 1 |  |  |  |  |  |  |  |  |  |  |  |  |  |  |  |
| TDS | -0.14 | 1 |  |  |  |  |  |  |  |  |  |  |  |  |  |  |
| F- | 0.55 | 0.49 | 1 |  |  |  |  |  |  |  |  |  |  |  |  |  |
| Cl- | 0.35 | 0.56 | **0.91** | 1 |  |  |  |  |  |  |  |  |  |  |  |  |
| NO3- | 0.31 | 0.35 | 0.61 | 0.17 | 1 |  |  |  |  |  |  |  |  |  |  |  |
| SO42- | -0.23 | 0.68 | 0.13 | 0.53 | 0.32 | 1 |  |  |  |  |  |  |  |  |  |  |
| NO2- | 0.11 | 0.23 | 0.18 | 0.11 | **0.78** | -0.09 | 1 |  |  |  |  |  |  |  |  |  |
| HCO3- | **0.68** | 0.77 | **0.47** | -0.16 | -0.10 | 0.33 | 0.15 | 1 |  |  |  |  |  |  |  |  |
| Mg2+ | -0.19 | 0.89 | **0.41** | 0.14 | -0.12 | -0.21 | -0.11 | **0.57** | 1 |  |  |  |  |  |  |  |
| Ca2+ | -0.17 | 0.88 | 0.12 | -0.14 | 0.01 | 0.44 | 0.07 | **0.74** | **0.76** | 1 |  |  |  |  |  |  |
| Na+ | -0.25 | 0.62 | 0.11 | 0.29 | 0.13 | 0.14 | -0.10 | -0.17 | -0.28 | -0.18 | 1 |  |  |  |  |  |
| K+ | -0.13 | 0.54 | 0.15 | -0.14 | -0.17 | -0.05 | 0.05 | -0.10 | 0.19 | -0.22 | **0.57** | 1 |  |  |  |  |
| U | 0.32 | 0.35 | 0.36 | 0.21 | 0.24 | 0.05 | 0.42 | 0.47 | 0.05 | 0.18 | -0.18 | -0.06 | 1 |  |  |  |
| As | 0.34 | 0.14 | **0.79** | -0.21 | 0.10 | -0.50 | 0.29 | -0.12 | 0.28 | 0.31 | -0.08 | 0.10 | 0.53 | 1 |  |  |
| Cr | -0.38 | 0.37 | -0.15 | -0.09 | 0.07 | 0.02 | -0.20 | 0.17 | -0.06 | 0.26 | -0.06 | 0.33 | -0.22 | -0.10 | 1 |  |
| Mn | -0.13 | 0.29 | -0.09 | 0.13 | 0.11 | -0.21 | 0.05 | -0.01 | 0.19 | 0.17 | -0.16 | 0.14 | -0.18 | 0.27 | 0.36 | 1 |
| Streamwater | | | | | | | | | | | | | | | | |
| pH | 1 |  |  |  |  |  |  |  |  |  |  |  |  |  |  |  |
| TDS | 0.52 | 1 |  |  |  |  |  |  |  |  |  |  |  |  |  |  |
| F- | 0.26 | 0.44 | 1 |  |  |  |  |  |  |  |  |  |  |  |  |  |
| Cl- | 0.48 | 0.53 | **0.69** | 1 |  |  |  |  |  |  |  |  |  |  |  |  |
| NO3- | 0.48 | 0.32 | 0.45 | 0.24 | 1 |  |  |  |  |  |  |  |  |  |  |  |
| SO42- | -0.28 | 0.62 | 0.12 | 0.45 | 0.36 | 1 |  |  |  |  |  |  |  |  |  |  |
| NO2- | 0.13 | 0.20 | 0.13 | -0.22 | **0.69** | -0.14 | 1 |  |  |  |  |  |  |  |  |  |
| HCO3- | **0.45** | 0.71 | 0.12 | -0.28 | -0.31 | 0.39 | 0.10 | 1 |  |  |  |  |  |  |  |  |
| Mg2+ | 0.13 | 0.82 | **0.44** | 0.16 | -0.26 | 0.04 | -0.19 | **0.51** | 1 |  |  |  |  |  |  |  |
| Ca2+ | -0.24 | 0.81 | 0.10 | -0.16 | -0.15 | **0.63** | -0.16 | **0.65** | **0.72** | 1 |  |  |  |  |  |  |
| Na+ | -0.12 | 0.50 | -0.13 | 0.26 | -0.15 | 0.10 | -0.18 | -0.11 | -0.17 | -0.16 | 1 |  |  |  |  |  |
| K+ | -0.12 | 0.59 | -0.15 | 0.18 | -0.31 | 0.06 | -0.25 | -0.41 | 0.20 | -0.14 | 0.59 | 1 |  |  |  |  |
| U | 0.29 | 0.21 | 0.26 | 0.19 | 0.25 | -0.03 | 0.38 | 0.35 | -0.04 | 0.44 | -0.11 | -0.12 | 1 |  |  |  |
| As | -0.23 | 0.24 | **0.56** | -0.35 | -0.23 | -0.14 | 0.35 | 0.25 | 0.07 | 0.39 | -0.15 | -0.15 | 0.31 | 1 |  |  |
| Cr | -0.41 | 0.20 | -0.28 | -0.12 | -0.26 | -0.36 | -0.22 | 0.15 | 0.05 | 0.17 | -0.32 | 0.28 | -0.36 | -0.13 | 1 |  |
| Mn | -0.11 | 0.42 | -0.13 | -0.22 | 0.15 | -0.24 | -0.18 | -0.14 | 0.27 | 0.12 | -0.21 | 0.10 | -0.23 | 0.36 | 0.16 | 1 |

Table 2. Pearson correlation matrix of chemical constituents in riparian groundwater and streamwater of Kishanganga basin.
