# Supplementary material for: Hydrological connectivity between riparian groundwater and streamwater system in Kishanganga Basin: insights from solutes and stable water isotopes
Source: Research Square preprint supplement (doi:10.21203/rs.3.rs-7332425/v1), 2025-09-22
Supplement: Supplementary file 2 [file e99f043b3e4363242321551b.docx]

| Groundwater | | | | | Streamwater | | | | Standards |
| --- | --- | --- | --- | --- | --- | --- | --- | --- | --- |
| Parameter | Min | Max | Mean | St. D. | Min | Max | Mean | St. Dev | WHO (2011) |
| Temp. (°C) | 10.43 | 14.63 | 12.98 | 1.2 | 6.15 | 27.42 | 16.01 | 6.38 | 25-27 |
| pH | 7.05 | 8.4 | 7.82 | 0.4 | 6.4 | 8.4 | 7.80 | 0.38 | 6.5-8.5 |
| TDS (mg/L) | 40 | 660 | 133 | 98.56 | 10 | 392 | 79 | 37.7 | 1000 |
| EC (μS/cm) | 70 | 1330 | 275.42 | 197 | 20 | 530 | 188.1 | 74.6 | 800 |
| Mg2+ (mg/L) | 0.90 | 81.29 | 20.81 | 11.30 | 0.90 | 24.48 | 7.01 | 4.92 | 150 |
| Ca2+(mg/L) | 14.36 | 193.9 | 54.51 | 25.27 | 4.35 | 69.08 | 27.70 | 11.96 | 200 |
| Na+ (mg/L) | 0.27 | 12.80 | 2.26 | 1.81 | 0.21 | 11.69 | 1.96 | 1.95 | 200 |
| K+ (mg/L) | 0.15 | 1.95 | 0.58 | 0.42 | 0.08 | 4.47 | 0.56 | 0.49 | 12 |
| HCO3⁻ (mg/L) | 206 | 386 | 246.76 | 25.27 | 62 | 325 | 159.52 | 30.90 | 400 |
| F-(mg/L) | 0.12 | 2.57 | 0.28 | 0.39 | 0.10 | 1.06 | 0.20 | 0.21 | 1.5 |
| Cl-(mg/L) | 0.28 | 18.25 | 3.62 | 4.27 | 0.15 | 41.8 | 1.83 | 4.43 | 300 |
| NO3- (mg/L) | 0.18 | 10.80 | 1.07 | 1.37 | 0.3 | 15.01 | 0.87 | 1.84 | 45 |
| SO42- (mg/L) | 0.16 | 78.88 | 12.79 | 19.02 | 0.18 | 166.1 | 13.61 | 16.91 | 250 |
| U (mg/L) | 0.0045 | 0.025 | 0.0096 | 0.002 | 0.0016 | 0.017 | 0.0065 | 0.0021 | 0.03 |
| Cr (mg/L) | 0.007 | 0.06 | 0.005 | 0.006 | 0.0002 | 0.002 | 0.001 | 0.001 | 0.05 |
| Mn (mg/L) | 0.0042 | 0.075 | 0.01 | 0.009 | 0.0006 | 0.065 | 0.003 | 0.0037 | 0.05 |
| As (mg/L) | 0.006 | 0.016 | 0.004 | 0.001 | 0.001 | 0.013 | 0.0017 | 0.0032 | 0.01 |

Table 1. Descriptive statistical summary of physio-chemical parameters in riparian groundwater and stream of Kishanganga basin with permissible limit given by World Health Organization (WHO, 2017).
